# Supplementary material for: Development of a psychrotolerant composite microbial agent for nitrogen removal and its nitrogen metabolism pathways
Source: Research Square preprint supplement (doi:10.21203/rs.3.rs-7370617/v1), 2025-08-22
Supplement: Supplementary file 1 [file ff30567cd7ed30a117474991.docx]

**Supplementary Information**

**Development of a psychrotolerant composite microbial agent for nitrogen removal and its nitrogen metabolism pathways**

**Yihua Dong1 · Jing Xu1 · Feng Chen2 · Liang Li3 · Guangsheng Qian4 · Peng Zhang5**

1Key Laboratory of Ecological Restoration of Regional Contaminated Environment, Ministry of Education, College of Environment, Shenyang University, Shenyang 110044, China

2**Liaoning Huadian Tieling Power Generation Co., Ltd.**‌‌, Tieling 112008, Liaoning, China

3Department of Environmental Engineering, School of Resources & Civil Engineering, Northeastern University, Shenyang 110819, China

4Datang Environmental Protection Technology Research Institute, Datang Environment Industry Group Co., Ltd., Beijing, 100097, China.

5Liaoning Huikang Testing and Evaluation Technology Co., Ltd, Shenyang 110017, Liaoning, China

🖂 Corresponding author: Yihua Dong

E-mail addresses: harvesttime@163.com

Tel: +86-13516093662

ORCID: [0000-0002-1305-5604](http://orcid.org/0000-0002-1305-5604" \t "http://mail.163.com/js6/read/_blank)

**Table S1** PCR primer list

| Target gene | Primer sequence (5’ to 3’) |
| --- | --- |
| 16S rDNA | 27F:AGTTTGATCMTGGCTCAG  1492R:GGTTACCTTGTTACGACTT |
| *hao* | *hao*-F:GTTTCGGCATGGATACGCT  *hao*-R:CCAGGCATCAAAGAATACCC |
| *nap*A | *nap*A-F:CATTGCCGACTATGAAGCTCAGG  *nap*A-R:AAAATATAGCGACTATTGATCTCTTGCAGAAAATATAGCGACTATTGATCTCTTGCAG |
| *nir*S | nirS-cd3aF:GTSAACGTSAAGGARACSGG  nirS-R3cd:GASTTCGGRTGSGTCTTGA |
| *nir*K | *nir*K-F:CGAACAAGGCAAGGATTTG  *nir*K-R:ACTGTCAACACACCGCTCA |
| *cnor*B | *cnorB-*F:CGNGARTTYCTSGARCARCC  *cnorB-*R:CRTADGCVCCRWAGAAVGC |
| *nos*Z | *nosZ-*F:CCCGCTGCACACC(A/G)CCTTCGA  *nosZ-*R:CGTCGCC(C/G)GAGATCTCGATCA |

**Table S2** Levels and coded values of process variables for the Box-Behnken design

| Variables | Symbols | Levels a | | |
| --- | --- | --- | --- | --- |
| -1 | 0 | 1 |
| C/N | A | 5 | 6 | 7 |
| Temperature (℃) | B | 7 | 10 | 13 |
| pH | C | 6.5 | 7.5 | 8.5 |
| Shaking speed (rpm) | D | 140 | 160 | 180 |

a low level (−1), center level (0), and high level (+1).

**Table S3**  Reaction system and process of PCR amplification for function genes

| PCR reaction system | Reaction component | | Volume (μL) | |
| --- | --- | --- | --- | --- |
| 10 X PCR Buffer | | 2.5 | |
| dNTP (each 10 mM) | | 1 | |
| Taq Plus DNA Polymerase（5 U/μL） | | 0.2 | |
| 50mM MgSO4 | | 12.5 | |
| Primers (10 µM) | | 1 | |
| Primers 1492R (10 µM) | | 1 | |
| Template (DNA) | | 1 | |
| ddH2O | | 9.5 | |
| PCR reaction process | Process | Temperature (℃) | Time | Cycles |
| Pre-denaturation | 94 | 4 min |  |
| Denaturation | 94 | 45 s | 30 |
| Annealing | 55 | 45 s |
| Extension | 72 | 1 min |
| Further extension | 72 | 10 min |  |

**Table S4** Experimental matrices based on Box-Behnken design and their respective responses

| Run | Independent variables | | | | Response variable (*Y*) |
| --- | --- | --- | --- | --- | --- |
| A-C/N | B-Temperature (℃) | C-pH | D-shaking speed (r/min) | TN removal efficiency (%) |
| 1 | 5 | 7 | 7.5 | 160 | 80.76 |
| 2 | 7 | 7 | 7.5 | 160 | 76.08 |
| 3 | 5 | 13 | 7.5 | 160 | 82.05 |
| 4 | 7 | 13 | 7.5 | 160 | 80.24 |
| 5 | 6 | 10 | 6.5 | 140 | 83.55 |
| 6 | 6 | 10 | 8.5 | 140 | 75.01 |
| 7 | 6 | 10 | 6.5 | 180 | 81.72 |
| 8 | 6 | 10 | 8.5 | 180 | 74.17 |
| 9 | 5 | 10 | 7.5 | 140 | 86.09 |
| 10 | 7 | 10 | 7.5 | 140 | 83.91 |
| 11 | 5 | 10 | 7.5 | 180 | 83.78 |
| 12 | 7 | 10 | 7.5 | 180 | 80.89 |
| 13 | 6 | 7 | 6.5 | 160 | 77.97 |
| 14 | 6 | 13 | 6.5 | 160 | 79.87 |
| 15 | 6 | 7 | 8.5 | 160 | 67.75 |
| 16 | 6 | 13 | 8.5 | 160 | 70.35 |
| 17 | 5 | 10 | 6.5 | 160 | 85.56 |
| 18 | 7 | 10 | 6.5 | 160 | 82.37 |
| 19 | 5 | 10 | 8.5 | 160 | 76.31 |
| 20 | 7 | 10 | 8.5 | 160 | 71.85 |
| 21 | 6 | 7 | 7.5 | 140 | 79.58 |
| 22 | 6 | 13 | 7.5 | 140 | 80.83 |
| 23 | 6 | 7 | 7.5 | 180 | 72.61 |
| 24 | 6 | 13 | 7.5 | 180 | 79.18 |
| 25 | 6 | 10 | 7.5 | 160 | 90.67 |
| 26 | 6 | 10 | 7.5 | 160 | 89.20 |
| 27 | 6 | 10 | 7.5 | 160 | 89.28 |
| 28 | 6 | 10 | 7.5 | 160 | 88.36 |
| 29 | 6 | 10 | 7.5 | 160 | 89.64 |

**Table S5** Base length of functional genes for key enzyme of isolated strains

| Strains | *hao* | *napA* | *nirS* | *nirK* | *conrB* | *nosZ* |
| --- | --- | --- | --- | --- | --- | --- |
| *Pseudomonas veronii* HN1 | 282bp |  |  |  |  | 396bp |
| *Pseudomonas poae* HN2 | 265bp |  |  |  |  | 352bp |
| *Pseudomonas peli* HN3 | 1752bp |  |  |  |  | 298bp |
| *Aeromonas* sp. AD1 |  | 471bp | 394bp | 413bp | 624bp | 314bp |
| *Pseudomonas extremaustralis* AD2 |  | 482bp | 395bp | 686bp | 616bp | 539bp |
| *Serratia liquefaciens* AD3 |  | 891bp | 374bp | 198bp | 592bp | 281bp |

**Fig. S1** Cell morphology of isolated strains by SEM


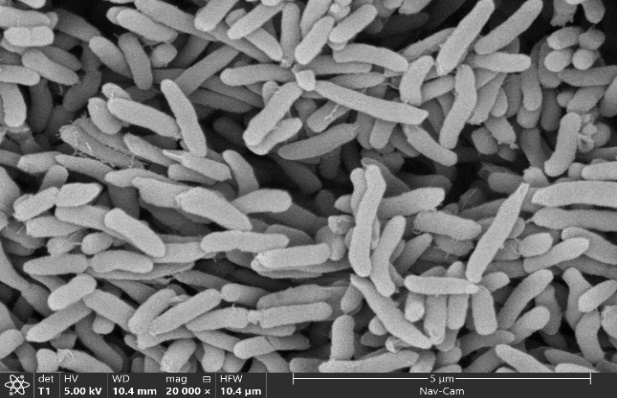

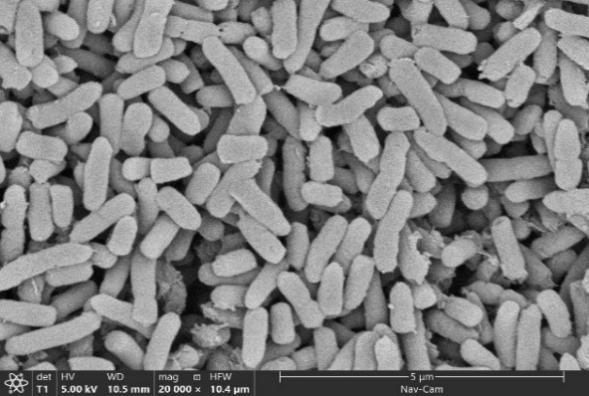


(**A**) HN1 (**B**) HN2


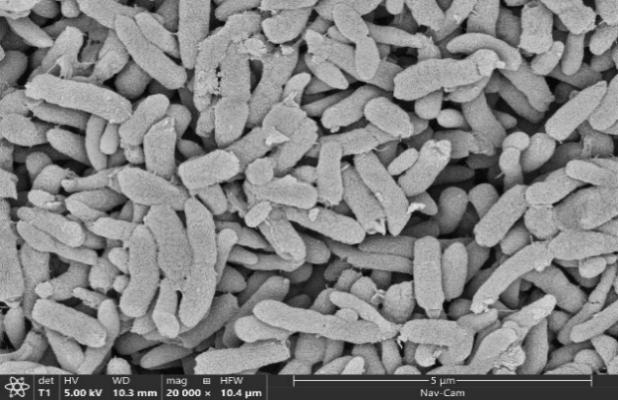

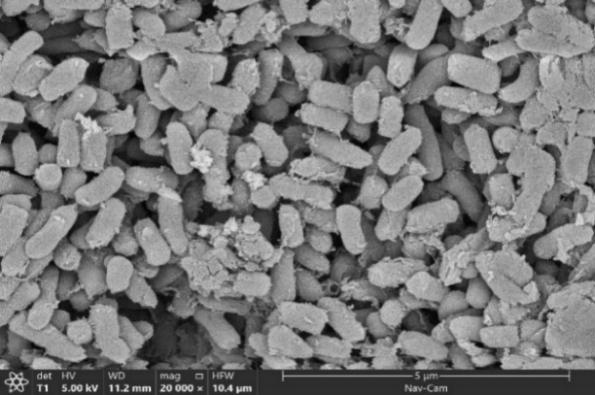


(**C**) HN3 (**D**) AD1


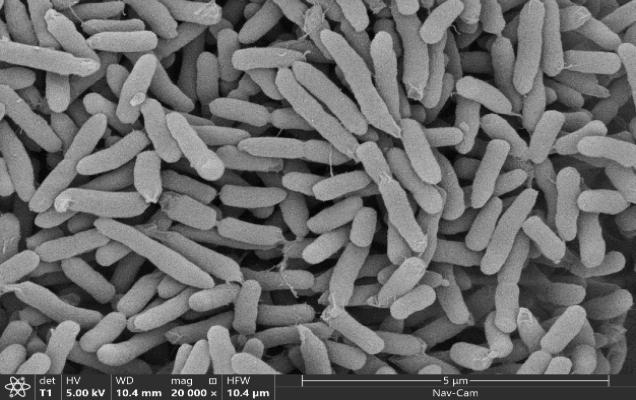

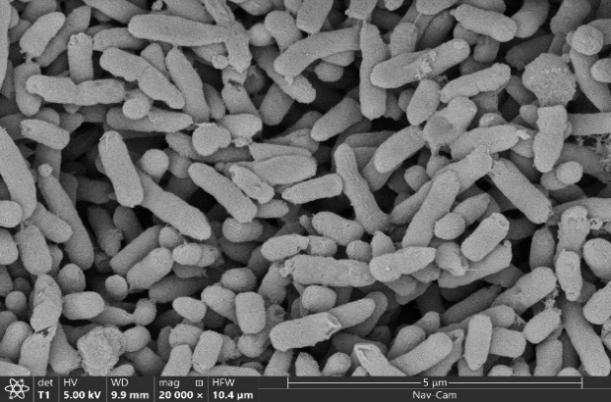


(**E**) AD2 (**F**) AD3

**Fig. S2** Phylogenetic tree constructed with the neighbor-joining method from six isolated strains and reference strains. 0.005 presents the genetic distance


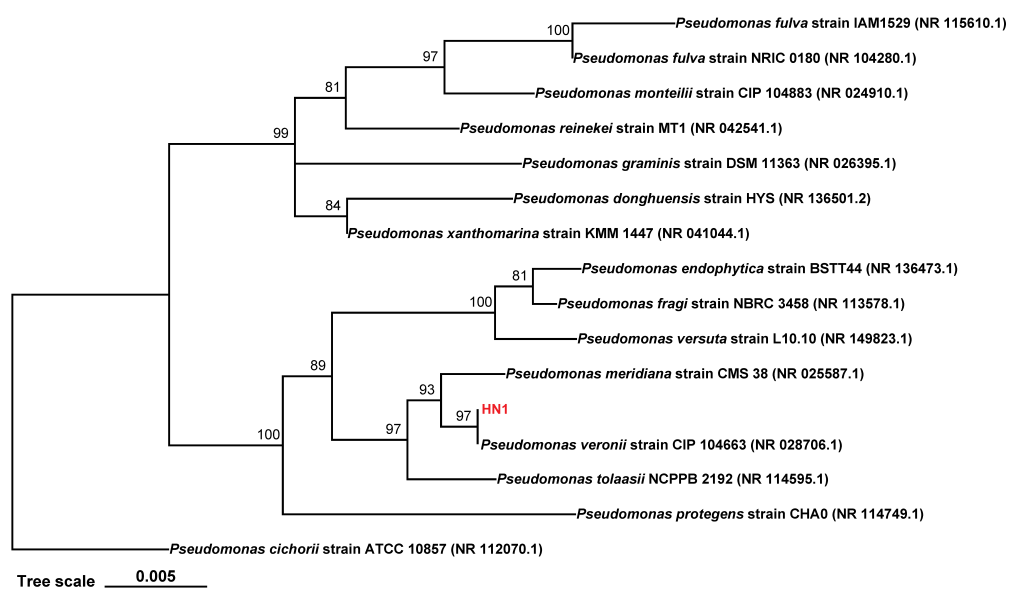
(**A**) HN1


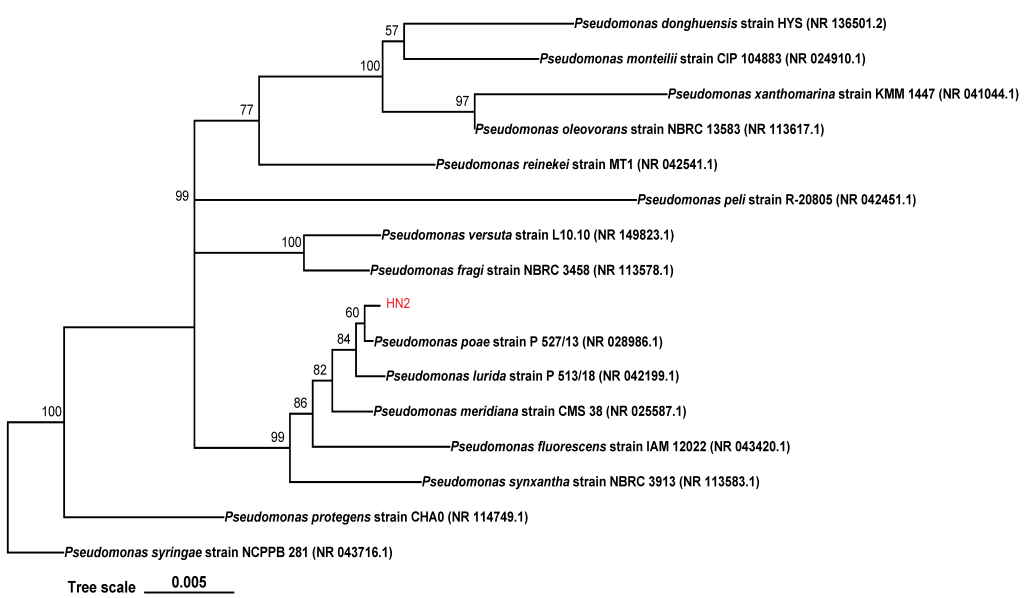
(**B**) HN2


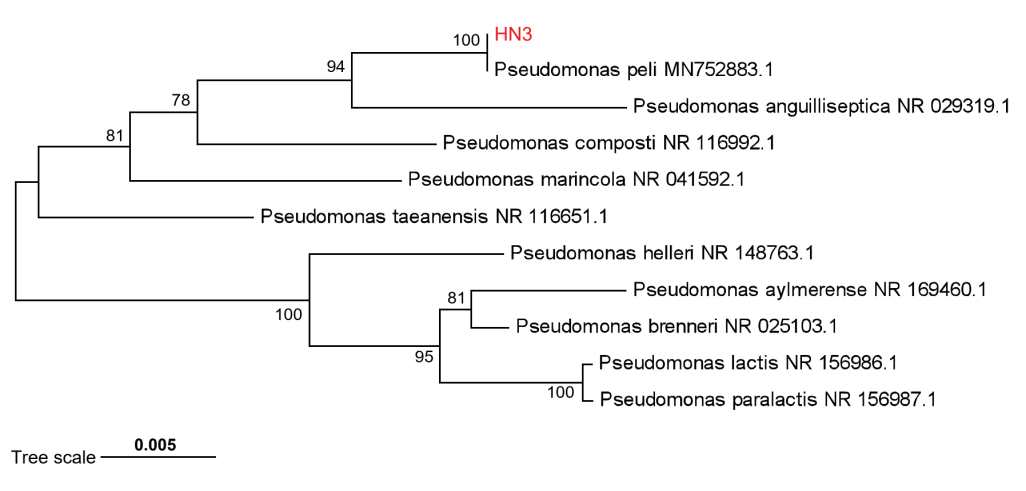
(**C**) HN3


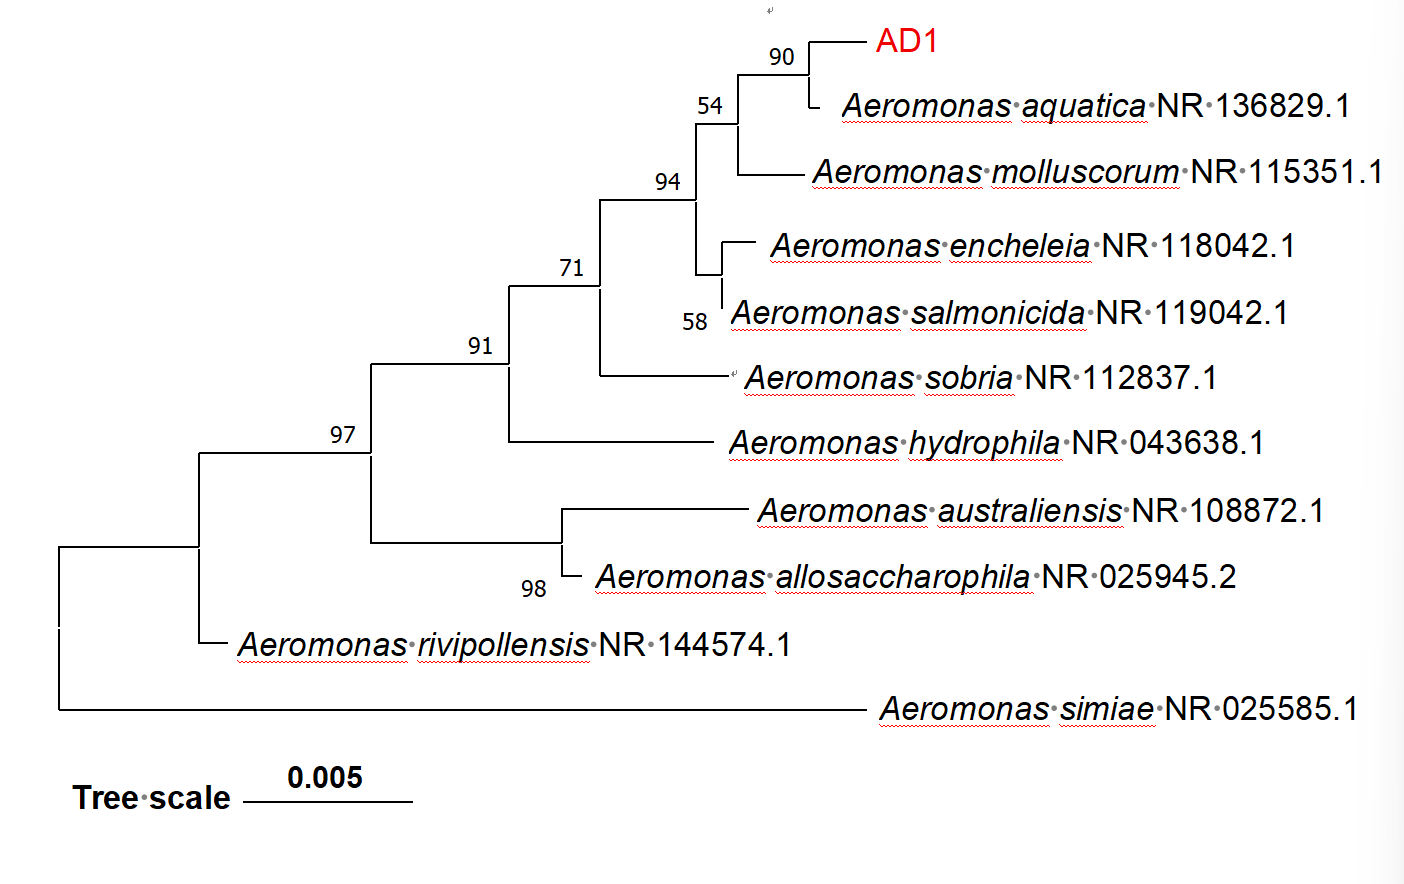


(**D**) AD1


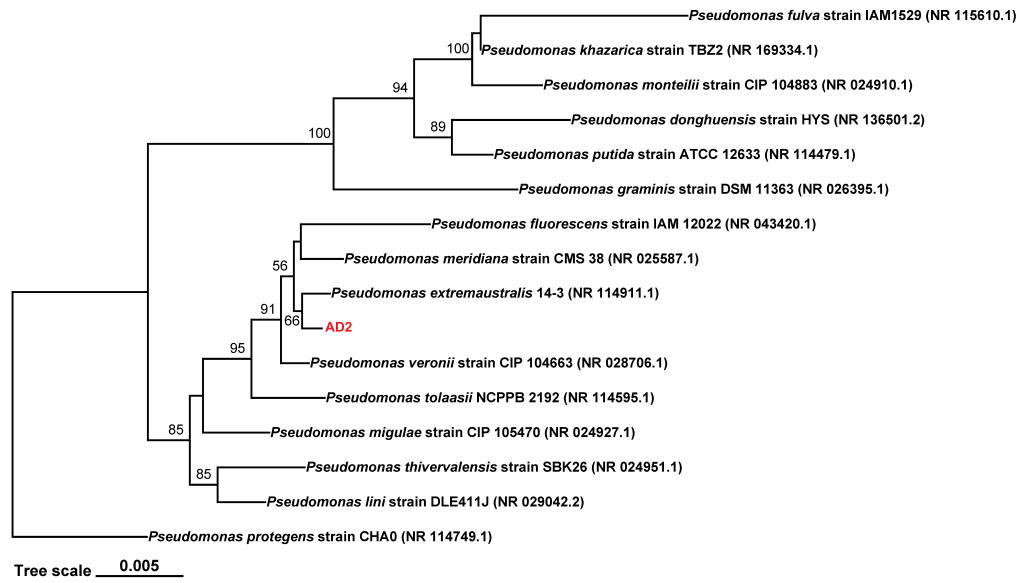
(**E**) AD2


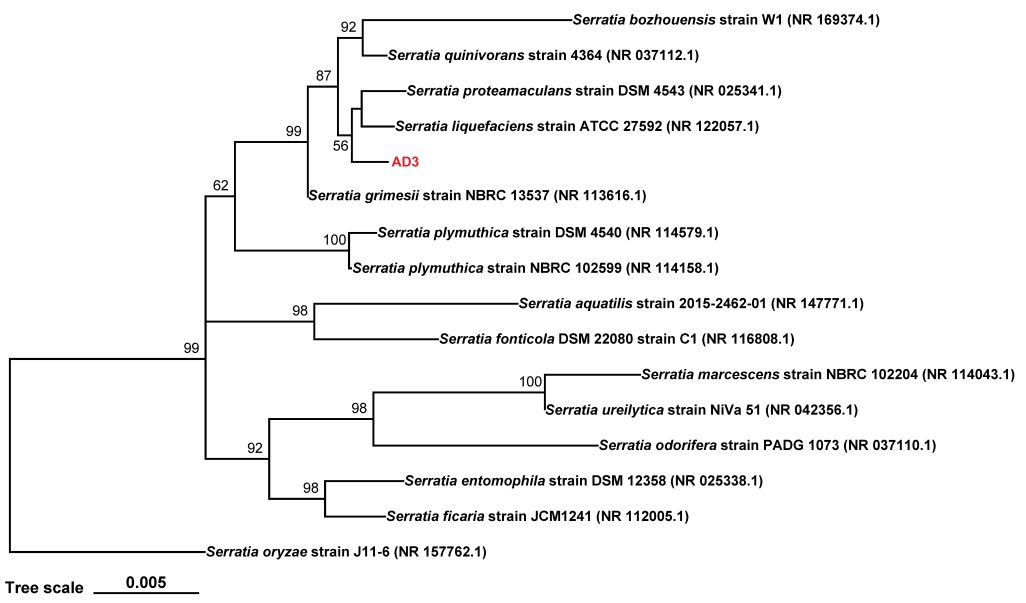
(**F**) AD3
